# Supplementary material for: Identification of Methanogenic archaea in the Hyporheic Sediment of Sitka Stream
Source: PLoS One. 2013 Nov 20;8(11):e80804. doi: 10.1371/journal.pone.0080804 (PMC3835567; doi:10.1371/journal.pone.0080804)
Supplement: File S1 — Original data of physico-chemical parameters and variables of the hyporheic interstitial water and sediment used for Table 2 calculation. (XLS) [file pone.0080804.s001.xls]

## Sheet: List4
SITKA LOK 4	2010-10-04
	upper	deeper
DAPI abund	4,28 x 106	6.18
MG FISH %	0.1163	0.1589
MG FISH abund	0,65 x 106	1.01
MP	192	174
AC	1.72	2.02
diss methan	2262.65	3856.01
Diss oxygen	59.37	17.54
ferrous	3.7	12.26
LOK. 4		oxygen %
	1	2	3	4	5	Average	SD	SE
50 cm	20	17.7	16.2	7.9	14.1	15.18	4.11796	2.91184
40 cm	13.1	19.2	17.1	10.3	12.9	14.52	3.19399	2.2585
30 cm	20.4	20	25.8	41	34.2	28.28	8.16882	5.77623
20 cm	33	30.6	70.2	42	74.2	50	18.5636	13.1265
10 cm	75.6	71.8	93.4	90.1	90.5	84.28	8.79577	6.21955
LOK. 4		Fe2+
	1	2	3	4	5	Average	SD	SE
50 cm	1.959		19.796	19.796	9.171	12.6805	7.55857	5.34472
40 cm	3.58	9.534	20.413	20.474	11.793	13.1588	6.52524	4.61404
30 cm	21.073	5.339	0	13.359	8.319	9.618	7.17935	5.07657
20 cm	1.304	1.057	6.548	6.344	7.008	4.4522	2.68112	1.89584
10 cm	0	0	0	0	0	0	0	0
LOK. 4		CH4
	sonda 1	sonda 2	sonda 3	sonda 4	sonda 5	sonda 6			AV	SD	SE
50 cm	2324.97	2283.36	5713.42	10217.6	3304.5	1155.5			4166.56	3048.38	2155.53
40 cm	2122.02	1765.41	2499.16	6435.41	2306	2591.2			2953.2	1580.27	1117.42
30 cm	1069.49	3368.9	4234.93	6813.14	11789.2	2966.5			5040.36	3468.93	2452.9
20 cm	842.84	850.81	1251.93	2516.83	7603.6	132.9			2199.82	2521.02	1782.63
10 cm	8.89	14.44	31.44	243.281	27.5	1022.1			224.609	365.881	258.717
LOK.4	Acetate
									AV	SD	SE
50 cm	0.703054366	1.748624451	3.140647803	2.05488	1.7285	0			1.89169	0.163192	0.115394
40 cm	0.870444484	1.768175341	3.02610259	2.14363	2.00656	0.700881859			2.0751	0.068533	0.0484601
30 cm	1.961154123	2.586552586	3.32673	0.635028771	1.50769	1.61591			2.15011	0.833167	0.589138
20 cm	2.117101221	1.635459301	3.64771	1.97116	1.27998	0			1.72471	1.31635	0.930797
10 cm	1.893416041	1.391878215	0.587071588	0.925072	0	0			0.925072	0	0
Met Potential
	orig.-ug/kg/h	/16	x1000	/24
10	101.01	6.31313	6313.12	263.047	pmol/gDW/s	see next page for more…
20	43.66	2.72875	2728.75	113.698
30	78.475	4.90469	4904.69	204.362
40	86.35	5.39687	5396.88	224.87
50	41.325	2.58281	2582.81	107.617
LOK 4	TBA, FISH
											recalculation from ml sed to WW						hloubky 0-25 a 25-50 z hloubek 10, 20, 30, 40, 50 cm nasledovne: 0-25: 2x hodnota 10cm, 2x hodnota 20cm, 1x hodnota 30cm / 5 25-50: 2x hodnota 40cm, 2x hodnota 50cm, 1x hodnota 30cm / 5
		0-25 cm	25-50cm depth				0-25 cm	25-50cm depth			1ml ww => g ww	1 g ww => g dw	prepocet
	abund DAPI	5.88126e+06	4.913e+07			abund DAPI	1.71624e+06	1.51313e+07		10	3.08	0.769	(x / 3,08) * 0,77	0-25 cm	(x /2,81) * 0,83
		3.96865e+06	5.3541e+07				1.15811e+06	1.64898e+07		20	2.74	0.933	(x / 2,74) * 0,93					recalculation from WW to DW
	1 ml WW	5.76438e+06	6.89016e+07			1 g DW	1.68213e+06	2.12206e+07		30	2.38	0.756	(x / 2,38) * 0,76							sušina	pr.navažka	% DW/WW
		2.64975e+06	1.23423e+07				773238	3.80123e+06		40	2.82	0.817	(x / 2,82) * 0,82	25-50 cm	(x /2,63) * 0,82			10		4.875	5.775	0.844156	0-25 cm
		4.15062e+06	1.11768e+07				1.21121e+06	3.44228e+06		50	2.56	0.828	(x / 2,56) * 0,83					20		5.88225	7.03725	0.835873
		1.83955e+06	1.20434e+07				536809	3.70919e+06										30		2.066	2.735	0.755393
		5.88126e+06	2.87787e+06				1.71624e+06	886341										40	6.55645	6.3785	8.0275	0.816	25-50 cm
		3.96865e+06	1.49064e+07				1.15811e+06	4.59093e+06										50		7.313	8.8285	0.82834
		5.76438e+06	1.15473e+07				1.68213e+06	3.55641e+06
		2.64975e+06	1.23423e+07				773238	3.80123e+06
		4.15062e+06	1.11768e+07				1.21121e+06	3.44228e+06
		1.83955e+06	1.20434e+07				536809	3.70919e+06
		4.913e+07	2.87787e+06				1.43369e+07	886341
		5.3541e+07	1.49064e+07				1.56241e+07	4.59093e+06
		6.89016e+07	1.15473e+07				2.01065e+07	3.55641e+06	x 10 6
	prum	1.46721e+07	2.00907e+07			prum	4.28153e+06	6.18763e+06	4.28	6.18
						SD vyb	6.53504e+06	6.12965e+06	6.53	6.13
						SD	6.31345e+06	5.92181e+06
	%MG FISH	horní	spodní			MG abundance	horní	spodní
		3.25203	11.3382				55812.6	1.71562e+06
		7.53012	19.6361				87207.2	3.23795e+06
		9.10138	19.084				153097	4.04974e+06
		13.7845	11.0169				106587	418780
		8.64	6.86275				104649	236235
		19.8556	9.76013				106587	362022
		3.25203	21.4953				55812.6	190522
		7.53012	24.6191				87207.2	1.13025e+06
		9.10138	20.3934				153097	725271
		13.7845	11.0169				106587	418780
		8.64	6.86275				104649	236235
		19.8556	9.76013				106587	362022
		11.3382	21.4953				1.62554e+06	190522
		19.6361	24.6191				3.06795e+06	1.13025e+06
		19.084	20.3934				3.83712e+06	725271	x 10 6
	prum	11.6257	15.8902			prum	650566	1.00863e+06	0.65	1.01
						SD vyb	1.212e+06	1.16411e+06	1.21	1.16
						SD	1.17091e+06	1.12463e+06

## Sheet: List1
vzorek	pik					standart			objem (l)	hmotnost (kg)		koncentrace (mikrog/l)			potencial (mikrog/kg DW/den)
	start	1day	2day	3day	start	1day	2day	3day			start	1day	2day	3day	1day	2day	3day
1	3.5	31.3	210	797	10698	10041	9709	9862	0.225	15.88	0.0442113	0.421245	2.92289	10.921	5.34211	35.4452	113.323
2	7.1	27.7	185	611	10698	10041	9709	9862	0.225	15.92	0.0896858	0.372795	2.57493	8.37229	4.00124	31.1231	81.935
3	7.1	19.1	122	481	10698	10041	9709	9862	0.225	15.32	0.0896858	0.257054	1.69806	6.59095	2.45808	21.1636	71.8603	89.0394	12.4852
1	10.6	21.2	102	391	10698	10041	9709	9862	0.225	16.32	0.133897	0.285316	1.41969	5.35771	2.08758	15.6393	54.2926
2	6	25.8	97	359	10698	10041	9709	9862	0.225	16.47	0.0757908	0.347225	1.3501	4.91923	3.70811	13.7004	48.7587
3	5.4	24.6	101	365	10698	10041	9709	9862	0.225	15.64	0.0682117	0.331075	1.40577	5.00145	3.7816	15.4608	51.7281	51.5931	1.59894
1	5.9	52.5	153	523	10698	10041	9709	9862	0.225	13.76	0.0745276	0.706562	2.12953	7.16646	10.3349	23.2681	82.3625
2	3.7	43	153	484	10698	10041	9709	9862	0.225	15.2	0.0467377	0.578708	2.12953	6.63206	7.87456	22.9563	66.6492
3	6.5	49.4	177	562	10698	10041	9709	9862	0.225	12.13	0.0821067	0.664841	2.46358	7.70086	10.8092	33.3649	97.1466	82.0527	8.8052
1	4.9	126	237	457	10698	10041	9709	9862	0.225	15.15	0.0618958	1.69575	3.29869	6.26209	24.2651	23.8061	44.0108
2	6.3	123	219	406	10698	10041	9709	9862	0.225	15.56	0.0795803	1.65537	3.04816	5.56325	22.7862	20.1399	36.3687
3	6.6	105	238	408	10698	10041	9709	9862	0.225	15.14	0.0833699	1.41312	3.31261	5.59066	19.7619	28.2288	33.8548	38.0781	3.05385
1	6.4	104	211	392	10698	10041	9709	9862	0.225	15.83	0.0808435	1.39967	2.93681	5.37142	18.7451	21.8482	34.6043
2	7.2	106	142	231	10698	10041	9709	9862	0.225	15.23	0.090949	1.42658	1.97643	3.1653	19.7319	8.12318	17.5637
3	5.5	92	148	267	10698	10041	9709	9862	0.225	15.47	0.0694749	1.23817	2.05994	3.65859	16.9978	11.9522	23.2512	25.1398	5.00901
K	4.8	11.2	10.7	22.2	10698	10041	9709	9862	0.225	14.55	0.0606326	0.150733	0.148928	0.304198	1.39331	-0.0279113	2.40107
K	5.2	12.1	13.3	27.6	10698	10041	9709	9862	0.225	15.44	0.0656854	0.162846	0.185116	0.378192	1.41587	0.324541	2.8136
K	3.7	62	81	140	10698	10041	9709	9862	0.225	16.24	0.0467377	0.834416	1.1274	1.91836	10.913	4.05921	10.9585
K	4.4	66	82	131	10698	10041	9709	9862	0.225	14.92	0.0555799	0.888249	1.14132	1.79504	12.557	3.81641	9.85839
1	4.5	37	169	651	10698	10041	9709	9862	0.225	16.05	0.0568431	0.497958	2.35223	8.92039	6.18385	25.9945	92.077
2	4.5	60	312	893	10698	10041	9709	9862	0.225	14.78	0.0568431	0.807499	4.34258	12.2364	11.4274	53.8155	120.17
3	10.1	59	267	943	10698	10041	9709	9862	0.225	16.35	0.127581	0.794041	3.71625	12.9215	9.17146	40.2138	126.678	112.975	10.6167
1	5	21	71	233	10698	10041	9709	9862	0.225	16.23	0.063159	0.282625	0.988216	3.1927	3.0425	9.78176	30.5613
2	4.6	24	97	270	10698	10041	9709	9862	0.225	15.97	0.0581063	0.323	1.3501	3.6997	3.73206	14.4707	33.1034
3	4.1	27	88	297	10698	10041	9709	9862	0.225	14.71	0.0517904	0.363375	1.22483	4.06967	4.76591	13.1766	43.5139	35.7262	3.96239
1	7.4	90	271	638	10698	10041	9709	9862	0.225	15.22	0.0934753	1.21125	3.77192	8.74226	16.5242	37.8549	73.4774
2	4.5	90	267	613	10698	10041	9709	9862	0.225	15.09	0.0568431	1.21125	3.71625	8.39969	17.2128	37.3509	69.8327
3	5.2	173	392	824	10698	10041	9709	9862	0.225	16.13	0.0656854	2.32829	5.45606	11.2909	31.5614	43.6298	81.3916	74.9005	3.41182
1	5.9	457	826	1439	10698	10041	9709	9862	0.225	15.78	0.0745276	6.15045	11.4967	19.718	86.6339	76.2298	117.224
2	6.2	517	932	1703	10698	10041	9709	9862	0.225	14.78	0.0783172	6.95795	12.9721	23.3355	104.731	91.5546	157.766
3	9	389	808	1479	10698	10041	9709	9862	0.225	15.75	0.113686	5.23529	11.2462	20.2661	73.1657	85.8698	128.857	134.616	12.0523
1	8.6	162	301	657	10698	10041	9709	9862	0.225	16.29	0.108633	2.18025	4.18948	9.00261	28.6135	27.7518	66.4797
2	6.3	105	210	409	10698	10041	9709	9862	0.225	15.65	0.0795803	1.41312	2.92289	5.60436	19.1723	21.7059	38.5515
3	8.4	112	273	613	10698	10041	9709	9862	0.225	15.33	0.106107	1.50733	3.79976	8.39969	20.5659	33.6462	67.5137	57.515	9.48643
K	5.4	12	12.1	25.3	10698	10041	9709	9862	0.225	15.55	0.0682117	0.1615	0.168414	0.346676	1.34983	0.100047	2.57935
K	7.5	96	76	90	10698	10041	9709	9862	0.225	17.04	0.0947385	1.292	1.05781	1.23323	15.8089	-3.09231	2.31636
K	8.5	349	538	779	10698	10041	9709	9862	0.225	15.87	0.10737	4.69695	7.48817	10.6743	65.0697	39.573	45.1723
K	9	139	211	269	10698	10041	9709	9862	0.225	16.09	0.113686	1.87071	2.93681	3.686	24.5699	14.9082	10.4765
														sonda 1	sonda 2
													50 cm	25.14	57.51	5.01	9.49
													40 cm	38.08	134.62	3.05	12.05
													30 cm	82.05	74.9	8.81	3.4
													20 cm	51.59	35.73	1.6	3.96
													10 cm	89.04	112.98	12.49	10.62
